# Supplementary material for: The most abundant maternal lncRNA Sirena1 acts post-transcriptionally and impacts mitochondrial distribution
Source: Oxford University Press journal article supplement (doi:10.1093/nar/gkz1239), 2020-01-02
Supplement: gkz1239_supplemental_files.zip [file gkz1239_supplemental_files.zip]

Archive with 8 entries (8 files):
- 2019 Ganesh Supplementary Material.pdf
- 2019 Ganesh Table S1 primers.xlsx
- 2019 Ganesh Table S2 high throughput datasets.xlsx
- 2019 Ganesh Table S3 ORF-analysis.xlsx
- 2019 Ganesh Table S4 Elob pseudogenes.xlsx
- 2019 Ganesh Table S5 differential expression.xlsx
- Supplementary file 1.avi
- Supplementary file 2.avi
