# Supplementary material for: The most abundant maternal lncRNA Sirena1 acts post-transcriptionally and impacts mitochondrial distribution
Source: Oxford University Press journal article supplement (doi:10.1093/nar/gkz1239), 2020-01-02
Supplement: gkz1239_supplemental_files.zip [file gkz1239_supplemental_files.zip › 2019 Ganesh Table S1 primers.xlsx]

## Sheet: primers
Category	Primers	Sequence
qPCR primers	Lnc1 qPCR Fwd 2	CAGCTTATGCAATAGCTACACACC
	Lnc1 qPCR Rev 2	CTTCTAGCTACCTTCACAGCTACC
	Lnc1 qPCR Fwd 6	AATCCATCTTCTCCAACACTGATC
	Lnc1 qPCR Rev 6	GAGGAGAACAATCAAGACAGTGTC
	Lnc1 qPCR Fwd 7	CTCCAGTGACCAGCATCAAGTA
	Lnc1 qPCR Rev 7	GTCTGTAGGCCTATCTTGAGTCC
	Elob qPCR Fwd 2	GCCAGAAGCAGCCGCCGGGAT
	Elob qPCR Rev 2	GTAAAGCCGCTGCTCCTCTGGC
	Ccnb1 Fwd	TACAGCTGGTCGGTGTAACG
	Ccnb1 Rev	TGCACCATGTCGTAGTCCAG
	Mos Fwd	GTATAAAGCCACTTACCACGG
	Mos Rev	CAATGTTCAGTTCAGCCCA
	Hprt Fwd	GCTACTGTAATGATCAGTCAACGG
	Hprt Rev	CTGTATCCAACACTTCGAGAGGTC
	Alas Fwd	CACTGGAAGAGCTGTGTGACGTG
	Alas Rev	CTGGCAATGTATCCTCCAACACAG
	Actb Fwd	TCCTTCTTGGGTATGGAATCCT
	Actb Rev	GTCTTTACGGATGTCAACGTCAC
Genotyping primers	Lnc1 CR GP 1 Fwd	CTGCACTTTCATCAATAACCTCAC
	Lnc1 CR GP 1 Rev	GAAAGTATGCATGAGATGGACCTA
	Lnc1 qPCR Fwd 7	CTCCAGTGACCAGCATCAAGTA
Luciferase reporter cloning primers	CcnB1_ 3'UTR_Fwd	ATGCGGCCGCGTCTCTTGGTTTGTCAACTTTCAG
	CcnB1_ 3'UTR_Rev	ATGGATCCGCTTTCCACCAATAAATTTTATTC
	Lnc1_3'UTR_Fwd1	CCGGCTCTACCCCAAGACCTTCC
	Lnc1_3'UTR_Rev1	CCACAAAGAGTATAACCACACTC
	Lnc1_3'UTR_Fwd2	ATGCGGCCGCGCTCCAAACGCCATCATAGCTTC
	Lnc1_3'UTR_Rev2	CACACTCTGATGAGTACGTAGAG
	Lnc1_3'UTR_Fwd2	ATGCGGCCGCGCTCCAAACGCCATCATAGCTTC
	Lnc1_3'UTR_Rev3	ATGGATCCCCTGTTTTTGTTTTTATTTTA
Luciferase reporter SDM primer	CcnB1_3'UTR_CPE1_SDM_Fwd	TTATACATCTGATATCAAGTTGAATAAAATTTA
	CcnB1_3'UTR_CPE1_SDM_Rev	CAGCAAATGAGACAGGATTC
	linc1_3'UTR_CPE_SDM_Fwd	GGTTCTTAGAATGTTAGATC
	linc1_3'UTR_CPE_SDM_Rev	TTGAATGGAGTTTCCCTTG
CRISPR oligonucleotides	Lnc1 CR1 5’	TAATACGACTCACTATAGGGTCTCAGCACAGCATCTTCGTTTAAGAGCTATGCTGGAAACAGCATAGCAAGTTTAAATAAGGCTAGTCCGTTATCAACTTGAAAAAGTGGCACCGAGTCGGTGCTTTTT
	Lnc1 CR4 3’	TAATACGACTCACTATAGGGCGTCTTGAAGATCAGACTGTTTAAGAGCTATGCTGGAAACAGCATAGCAAGTTTAAATAAGGCTAGTCCGTTATCAACTTGAAAAAGTGGCACCGAGTCGGTGCTTTTT
Mitochondria qPCR primers	mt-ND1_Fwd_1	TCCGAGCATCTTATCCACGC
	mt-ND1_Rev_1	GTATGGTGGTACTCCCGCTG
	mt-ND2_Fwd_1	ATCCTCCTGGCCATCGTACT
	mt-ND2_Rev_1	ATCAGAAGTGGAATGGGGCG
	mt-ND3_Fwd_1	GTTGCATTCTGACTCCCCCA
	mt-ND3_Rev_1	GGTAGACGTGCAGAGCTTGT
	mt-ND4L_Fwd_1	GCCATCTACCTTCTTCAACC
	mt-ND4L_Rev_1	GGATAATACTATGCCTTCCA
	mt-ND4_Fwd_1	GAAGCAACCTTAATCCCAAC
	mt-ND4_Rev_1	TGGAATAGAACCGATTAGGG
	mt-ND5_Fwd_1	CATAGCCTGGCAGACGAACA
	mt-ND5_Rev_1	GGTATTCCTGTGAGGGCGAG
	mt-ND6_Fwd_1	GCCGCTACCCCAATCCCTCC
	mt-ND6_Rev_1	ATTATGATGAAGTTGGAGTA
	mt-CYTB_Fwd_1	CTTCATGTCGGACGAGGCTT
	mt-CYTB_Rev_1	CCTCATGGAAGGACGTAGCC
	mt-COX1_Fwd_1	GCTAGCCGCAGGCATTACTA
	mt-COX1_Rev_1	CTCCTCCAGCGGGATCAAAG
	mt-COX2_Fwd_1	AACCGAGTCGTTCTGCCAAT
	mt-COX2_Rev_1	CTAGGGAGGGGACTGCTCAT
	mt-COX3_Fwd_1	CACTATTAACCCTTGGCCTA
	mt-COX3_Rev_1	CAATAGGAGTGTGGTGGCCT
	mt-ATP6_Fwd_1	CTATTCCCATCCTCAAAACG
	mt-ATP6_Rev_1	CTTTTGGTGTGTGGATTAGC
