# Supplementary material for: The most abundant maternal lncRNA Sirena1 acts post-transcriptionally and impacts mitochondrial distribution
Source: Oxford University Press journal article supplement (doi:10.1093/nar/gkz1239), 2020-01-02
Supplement: gkz1239_supplemental_files.zip [file gkz1239_supplemental_files.zip › 2019 Ganesh Table S2 high throughput datasets.xlsx]

## Sheet: datasets
dataset ID	figure	sample/experiment	reference	DOI
E-MTAB-2950	Fig 1, 2D, 5A	early development transcriptome	Abe et al., 2015	10.15252/embj.201490648
E-MTAB-4775	Fig 1, 2A, 2D	oocyte transcriptome	Karlic et al., 2017	10.1093/dnares/dsw058
GSE49417	Fig 2B	ENCODE tissue set	Yue et al., 2014	10.1038/nature13992
GSE70116	Fig 2D	oocyte transcriptome	Veselovska et al., 2015	10.1186/s13059-015-0769-z
GSE86470	Fig 3	golden hamster oocyte	Franke et al., 2017	10.1101/gr.216150.116
GSE137563	Fig 4A	rat oocytes	this work
GSE92761	Fig 5A	oocyte transcriptome	Freimer et al., 2018	10.1016/j.cub.2017.11.067
GSE10364	Fig 6A	oocyte small RNAs	Tam et al., 2008	10.1038/nature06904
GSE45983	Fig 6A	oocyte small RNAs	Garcia-Lopez et al., 2014	10.1016/j.bbagrm.2014.04.006
GSE83581	Fig 6A	oocyte small RNAs	Yang et al., 2016	10.1126/sciadv.1501482
GSE57514	Fig 6C, 6D	Dicer & Ago2 mutants	Stein et al., 2015	10.1371/journal.pgen.1005013
GSE137563	Fig 8A, 8B, 8D	Sirena knock-out	this work
GSE7774	Fig S1	Lhx8 mutant	Choi et al., 2008	10.1095/biolreprod.108.069393
GSE7775	Fig S1	Nobox mutant	Choi et al., 2008	10.1095/biolreprod.108.069393
GSE5558	Fig S1	Figla mutant	Joshi et al., 2007	10.1186/1471-213X-7-67
