# Supplementary material for: The most abundant maternal lncRNA Sirena1 acts post-transcriptionally and impacts mitochondrial distribution
Source: Oxford University Press journal article supplement (doi:10.1093/nar/gkz1239), 2020-01-02
Supplement: gkz1239_supplemental_files.zip [file gkz1239_supplemental_files.zip › 2019 Ganesh Table S3 ORF-analysis.xlsx]

## Sheet: Sirena ORF analysis
transcript_id	genomic position	AUG position	putative Kozak GCCGCCRCCAUGG	AA	translation	oocyte proteome matches	AUG in rat
ENSMUST00000209497.1	chr7:46967711-46975911	chr7:46969199	CCAUGAACAAUGC	105	MHGTGSRIWIDGSRSRSGSRTDVLESTRRRLKNYPGSLDVGLKIGLQTPKAGNFLFPLPVQFLCARNMWKSAVLNSVHRVPPQTRNPSSPTLIQPVRSSTQKYKI*	0	yes
ENSMUST00000209497.1	chr7:46967711-46975911	chr7:46975235	UUAUCUUUGAUGU	70	MLYASVFCLHVCLPGCGYQMSWNWLWTIFELPCRCLELNPGLLEEQPVPLTTEPSLEPLLGFLFCFLFFS*	0	no
ENSMUST00000209497.1	chr7:46967711-46975911	chr7:46975729	CUCUAGUAGAUGG	59	MGLGPHRTACSLALPPESCGFVTYGRSRGLEKGWLRRASRASSAQKARPTVAGARSCAV*	0	no
ENSMUST00000209497.1	chr7:46967711-46975911	chr7:46968243	ACGUUUCCUAUGU	47	MWGETTMCQPSSPTKLCMFWNLSSPLLRPTRVSHVKPWCLYRLTKPH*	0	no
ENSMUST00000209497.1	chr7:46967711-46975911	chr7:46975228	UGAUGUUAUAUGC	35	MHRCFACMSVCLGAVIRCPGTGYGQFLSCHVGAWN*	0	yes
ENSMUST00000209497.1	chr7:46967711-46975911	chr7:46975462	UGCUUAGGGAUGC	33	MPWTLSFSSNTVLDSLTSVKMVVLWLPIMRNAS*	0	no
ENSMUST00000209497.1	chr7:46967711-46975911	chr7:46970388	UAUUCCAUCAUGC	28	MLLGLACTYNLCPSLYSEVSSEPRLQSL*	0	no
ENSMUST00000209497.1	chr7:46967711-46975911	chr7:46967831	GUUCUUAGAAUGU	25	MLDQTPPGHIHFPHPSKSTQTCNLP*	0	no
ENSMUST00000209497.1	chr7:46967711-46975911	chr7:46969195	GAACAAUGCAUGG	22	MAPAQGFGLMDQDQDLVPELMC*	0	yes
ENSMUST00000209497.1	chr7:46967711-46975911	chr7:46969301	UUUUUCCCAAUGA	18	MIQGGRRWSTLCSSRNKL*	0	yes
ENSMUST00000209497.1	chr7:46967711-46975911	chr7:46969345	CAAGUCAACAUGU	15	MFSFPSSFGVSSFSQ*	0	no
ENSMUST00000209497.1	chr7:46967711-46975911	chr7:46975391	GGUGGUCUUAUGG	14	MAPDHEKRVLKTPG*	0	no
ENSMUST00000209497.1	chr7:46967711-46975911	chr7:46969206	ACCCAACCCAUGA	12	MNNAWHRLKDLD*	0	no
ENSMUST00000209497.1	chr7:46967711-46975911	chr7:46970402	CACAUUAGAAUGG	9	MAIPSCFLG*	0	no
ENSMUST00000209497.1	chr7:46967711-46975911	chr7:46975514	UUUCCUGUCAUGA	7	MKELVLV*	0	no
ENSMUST00000210486.1	chr7:46967747-46975911	chr7:46968554	GCCAGAAACAUGU	38	MWKSAVLNSVHRVPPQTRNPSSPTLIQPVRSSTQKYKI*	0	no
ENSMUST00000210794.1	chr7:46968645-46975512	chr7:46970388	UAUUCCAUCAUGC	23	MLLGLACTYNLCPSLYSEIWFQN*	0	no
		chr7:46969199	mouse genomic (mm10)		ATGCATGGCACCGGCTCA
			mouse Sirena1 transcript		ATGCATGGCACCGGCTCA
			rat genomic (rn6)		ATGCATGGCACTGGCTGA
			rat peptide		MetHisGlyThrGly *
		chr7:46975228	mouse genomic (mm10)		ATGCATCGGTGTTTTGCTTGCATGTCTGTCTGCCTGG----------------------------GTGCGGTTATCAGATGTCCTGGAACTGG
			mouse Sirena1 transcript		ATGCATCGGTGTTTTGCTTGCATGTCTGTCTGCCTGG----------------------------GTGCGGTTATCAGATGTCCTGGAACTGG
			rat genomic (rn6)		ATGCATTGGTGTTTTGCCTGCATGTCTGTCTGTCTGTCTGTCTGTCTGTCTGTCTGTCTGTCTGTGTGCAGGTATCAGATGCCCTGGAACTAG
			rat peptide		MetHisTrpCysPheAlaCysMetSerValCysLeuSerValCysLeuSerValCysLeuSerValCysArgTyrGlnMetProTrpAsn *
		chr7:46969195	mouse genomic (mm10)		ATGGCACCGGCTCAAGGATTTGGATTGATGGATC--AAGATCAAGGTCTGGCCCCTCTTGTCTCTCCCGATTTCCTAGTTGGCTGGCCATTCCCCCATCACCCAAG--CACACTTCCCTGA
			mouse Sirena1 transcript		ATGGCACCGGCTCAAGGATTTGGATTGATGGATC--AAGATCA------------------------------------------------------------------------------
			rat genomic (rn6)		ATGGCACTGGCTGAAAGGCTTGGATTGACAGATCACAAGATCAGGGTCTGGCCTCTCTTGTTTCTTCC-ATTCCCTAATCAGCTAGCCATTCCCCTATCACCCAAGTGCATACTTCCCTGA
			rat peptide		MetAlaLeuAlaGluArgLeuGlyLeuThrAspHisLysIleArgValTrpProLeuLeuPheLeuPr-oPheProAsnGlnLeuAlaIleProLeuSerProLysCysIleLeuPro *
		chr7:46969301	mouse genomic (mm10)		ATGATTCAAGGAGGCAGAAGGTGGAGCACACTGTGTTCATCAAGGAACAAACTCTAG
			mouse Sirena1 transcript		ATGATTCAAGGAGGCAGAAGGTGGAGCACACTGTGTTCATCAAGGAACAAACTCTAG
			rat genomic (rn6)		ATGATGCAAGGAGGCAGAGGGTGGAGTGCACTGTGTTCATCAAGGAACAAATACTAG
			rat peptide		MetMetGlnGlyGlyArgGlyTrpSerAlaLeuCysSerSerArgAsnLysTyr *
