# Supplementary material for: The most abundant maternal lncRNA Sirena1 acts post-transcriptionally and impacts mitochondrial distribution
Source: Oxford University Press journal article supplement (doi:10.1093/nar/gkz1239), 2020-01-02
Supplement: gkz1239_supplemental_files.zip [file gkz1239_supplemental_files.zip › 2019 Ganesh Table S4 Elob pseudogenes.xlsx]

## Sheet: Sheet1
coordinates	ID	symbol	type	length	identity	expression (FPKM)*	rat synteny	RNA orientation	BLAT NM_026305.2	score	start	end	note
chr17:23824740-23829109	NM_026305.2	Elob	protein coding	4370	100	1.508	yes	sense	1	505	1	508	original spliced gene
chr17:74438226-74438671	AK002223.1-12		pseudogene	445	97.4	0	no	-	0.98	415	4	437	Nlrc4 intron (in sense), Nlrc4 is expressed
chr11:100243259-100243693	AK152950.1-6		pseudogene	434	93.6	0	no	-	0.966	402	12	444	intergenic
chr11:6242340-6242778	AK002223.1-2		pseudogene	438	92.1	0	no	-	0.927	374	5	437	intergenic
chr12:115546010-115546425	AK019181.1-6		pseudogene	419	91.9	0.273	no	unknown	0.943	356	45	439	intergenic
chrX:139358429-139359320	AK002223.1-20		pseudogene	459	91.8	0	no	-	0.942	360	27	437	intergenic, ERV1 family insertion
chr14:57363341-57363790	AK019218.1-7		pseudogene	448	91.6	0	no	-	0.962	372	33	435	intergenic
chr1:166043279-166043741	AK019181.1-1		pseudogene	455	88.8	0	no	-	0.898	329	4	439	intergenic
chr7:46975364-46975762	NM_026305.2-16	Sirena1	lncRNA	399	83	865.612	yes	antisense	0.846	214	27	383	recycled pseudogene
chr16:13779781-13780194	AK002223.1-9		pseudogene	413	80	0	no	unknown	0.811	241	5	416	Elobl pseudogene, intergenic
chrX:12179692-12180056	AK152950.1-20		pseudogene	365	79.8	0.934	yes	unknown	0.855	214	5	386	intergenic
chr11:88972630-88973083	AK002223.1-4		protein coding?	437	77.6	5.007	yes	sense	0.808	237	31	458	Elobl gene inverted duplication, EST supported,
chr11:88964861-88965264	AK002223.1-3	Elobl	protein coding	404	73.3	489.759	yes	sense	0.83	170	4	261	recycled pseudogene
						* calculated RNA-seq of GV oocytes (E-MTAB-4775) for paired-end fragments perfectly matching Elob sequence
